# Supplementary material for: Interventions to improve patient health education competence among nursing personnel: a scoping review protocol
Source: HighWire-hosted journal article supplement (doi:10.1136/bmjopen-2024-087015), 2024-12-01
Supplement: bmjopen-2024-087015supp001_data_supplement.pdf [file bmjopen-2024-087015supp001_data_supplement.pdf]

**Table S1. Search strategy for Cochrane Library**

|   |    |                                                                                                                                                                                                                                                                                                                                                                                                                                                                   |
|---|----|-------------------------------------------------------------------------------------------------------------------------------------------------------------------------------------------------------------------------------------------------------------------------------------------------------------------------------------------------------------------------------------------------------------------------------------------------------------------|
| 1 | #1 | MeSH descriptor: [Nurses] this term only OR MeSH descriptor: [Students, Nursing] this term only OR (nurs* OR nursing student*):ti,ab,kw                                                                                                                                                                                                                                                                                                                           |
| 2 | #2 | MeSH descriptor: [Health Education] this term only OR MeSH descriptor: [Patient Education as Topic] this term only OR (health education OR education, health OR patient education OR education, patient* OR education of patient* OR patient teaching OR patient training OR hospital education OR clinical education):ti,ab,kw OR ((educat* OR inform* OR teach* OR train* OR learn*):ti,ab,kw NEAR/2 (health OR patient* OR consumer* OR individual*):ti,ab,kw) |
| 3 | #3 | MeSH descriptor: [Professional Competence] this term only OR (competenc* OR capabilit* OR capacit* OR abilit*):ti,ab,kw OR ((knowledge):ti,ab,kw NEAR/2 (skill*):ti,ab,kw)                                                                                                                                                                                                                                                                                        |
| 4 | #4 | MeSH descriptor: [Education, Nursing] this term only OR MeSH descriptor: [Nursing Education Research] this term only OR MeSH descriptor: [Education, Nursing, Baccalaureate] this term only OR MeSH descriptor: [Education, Nursing, Continuing] this term only OR MeSH descriptor: [Curriculum] this term only OR (educat* OR teach* OR learn* OR course* OR class* OR train* OR lecture* OR intervene* OR workshop):ti,ab,kw                                    |
| 5 | #5 | #1 AND #2 AND #3 AND #4                                                                                                                                                                                                                                                                                                                                                                                                                                           |

**Table S2. Search strategy for Embase**

|   |    |                                                                                                                                                                                                                                                                                                                                                                                                                                              |
|---|----|----------------------------------------------------------------------------------------------------------------------------------------------------------------------------------------------------------------------------------------------------------------------------------------------------------------------------------------------------------------------------------------------------------------------------------------------|
| 1 | #1 | 'nurse'/mj OR 'nursing student'/mj OR nurs* :ab,ti OR 'nursing student*':ab,ti                                                                                                                                                                                                                                                                                                                                                               |
| 2 | #2 | ('health education'/mj OR 'patient education'/mj OR 'health education':ab,ti OR 'education, health':ab,ti OR 'patient education':ab,ti OR 'education, patient*':ab,ti OR 'education of patient*':ab,ti OR 'patient teaching ':ab,ti OR 'patient training':ab,ti OR 'hospital education':ab,ti OR 'clinical education':ab,ti) OR ((educat* OR inform* OR teach* OR train* OR learn*) NEXT/1 (health OR patient* OR consumer* OR individual*)) |
| 3 | #3 | 'professional competence'/mj OR competenc* :ab,ti OR 'competence'/mj OR 'competency'/mj OR 'competencies'/mj OR capabilit* :ab,ti OR 'capacitance'/mj OR 'capacity'/mj OR abilit* :ab,ti OR (knowledge:ab,ti AND skill* :ab,ti)                                                                                                                                                                                                              |
| 4 | #4 | 'nursing education'/mj OR educat* :ab,ti OR teach* :ab,ti OR 'curriculum'/mj OR learn* :ab,ti OR course* :ab,ti OR class* :ab,ti OR train* :ab,ti OR lecture* :ab,ti                                                                                                                                                                                                                                                                         |
| 5 | #5 | #1 AND #2 AND #3 AND #4                                                                                                                                                                                                                                                                                                                                                                                                                      |

**Table S3. Search strategy for Medline**

|   |    |                                                          |
|---|----|----------------------------------------------------------|
| 1 | #1 | The search strategy of #1 is the same as that in Embase. |
| 2 | #2 | The search strategy of #2 is the same as that in Embase. |
| 3 | #3 | The search strategy of #3 is the same as that in Embase. |
| 4 | #4 | The search strategy of #4 is the same as that in Embase. |
| 5 | #5 | The search strategy of #5 is the same as that in Embase. |

**Table S4. Search strategy for CINAHL**

|   |    |                                                                                                                                                                                                                                                                                                                                                                               |
|---|----|-------------------------------------------------------------------------------------------------------------------------------------------------------------------------------------------------------------------------------------------------------------------------------------------------------------------------------------------------------------------------------|
| 1 | #1 | (MM "Nurses") OR (MM "Students, Nursing") OR AB (nurs* OR Nursing student*)                                                                                                                                                                                                                                                                                                   |
| 2 | #2 | (MM "Health Education") OR (MM " Patient Education") OR TI (health education OR education, health OR patient education OR education, patient* OR education of patient* OR patient teaching OR patient training OR hospital education OR clinical education) OR (AB (educat* OR inform* OR teach* OR train* OR learn*) N1 AB (health OR patient* OR consumer* OR individual*)) |
| 3 | #3 | (MM "Professional Competence") OR AB (competenc* OR capabilit* OR capacit* OR abilit*) OR AB (Knowledge N1 skill*)                                                                                                                                                                                                                                                            |
| 4 | #4 | (MM "Education, Nursing") OR (MM "Curriculum") OR AB (educat* OR teach* OR learn* OR course* OR class* OR train* OR lecture* OR intervene* OR workshop)                                                                                                                                                                                                                       |
| 5 | #5 | #1 AND #2 AND #3 AND #4                                                                                                                                                                                                                                                                                                                                                       |

**Table S5. Search strategy for ERIC**

|   |    |                                                                                                                                                                                                                                                                                                                                                                              |
|---|----|------------------------------------------------------------------------------------------------------------------------------------------------------------------------------------------------------------------------------------------------------------------------------------------------------------------------------------------------------------------------------|
| 1 | #1 | (DE "Nurses") OR (DE "Students, Nursing") OR AB (nurs* OR Nursing student*)                                                                                                                                                                                                                                                                                                  |
| 2 | #2 | (DE "Health Education") OR (DE "Patient Education") OR AB (health education OR education, health OR patient education OR education, patient* OR education of patient* OR patient teaching OR patient training OR hospital education OR clinical education) OR (AB (educat* OR inform* OR teach* OR train* OR learn*) N1 AB (health OR patient* OR consumer* OR individual*)) |
| 3 | #3 | (DE "Professional Competence") OR AB (competenc* OR capabilit* OR capacit* OR abilit*) OR AB (Knowledge N1 skill*)                                                                                                                                                                                                                                                           |
| 4 | #4 | (DE "Education, Nursing") OR (DE "Curriculum") OR AB (educat* OR teach* OR learn* OR course* OR class* OR train* OR lecture* OR intervene* OR workshop)                                                                                                                                                                                                                      |
| 5 | #5 | #1 AND #2 AND #3 AND #4                                                                                                                                                                                                                                                                                                                                                      |
